# Supplementary material for: Selective fluorescence sensing of Hg2+ and Zn2+ ions through dual independent channels based on the site-specific functionalization of mesoporous silica nanoparticles
Source: Royal Society of Chemistry journal article supplement (doi:10.1039/c3ta11677h), 2013-01-01
Supplement: c3ta11677h.pdf [file c3ta11677h.pdf]

Electronic supplementary information (ESI) for Journal of Materials Chemistry A  
This journal is © The Royal Society of Chemistry 2013

# **Selective Fluorescent Sensing of Hg<sup>2+</sup> and Zn<sup>2+</sup> Ions through Dual Independent Channel Based on the Site-Specific Functionalization of Mesoporous Silica Nanoparticles†**

**Xuejuan Wan, Shen Yao, Haiyang Liu, and Youwei Yao\***

Institute of Advanced Materials, Graduate School at Shenzhen, Tsinghua University, Shenzhen 518055, China; Key Laboratory for Advanced Materials of Ministry of Education, Department of Materials Science and Engineering, Tsinghua University, Beijing 100084, China.

\* To whom correspondence should be addressed. E-mail: yaoyw@sz.tsinghua.edu.cn

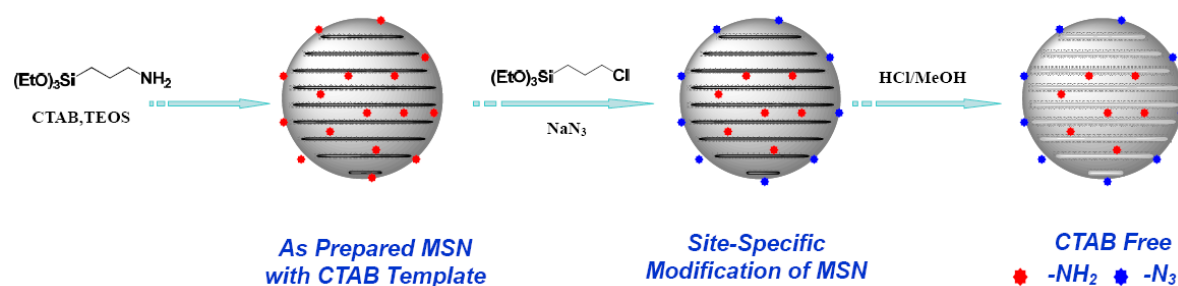

**Scheme S1.** Schematic illustration for the preparation of  $\text{N}_3\text{-MSN}(\text{NH}_2)$ .

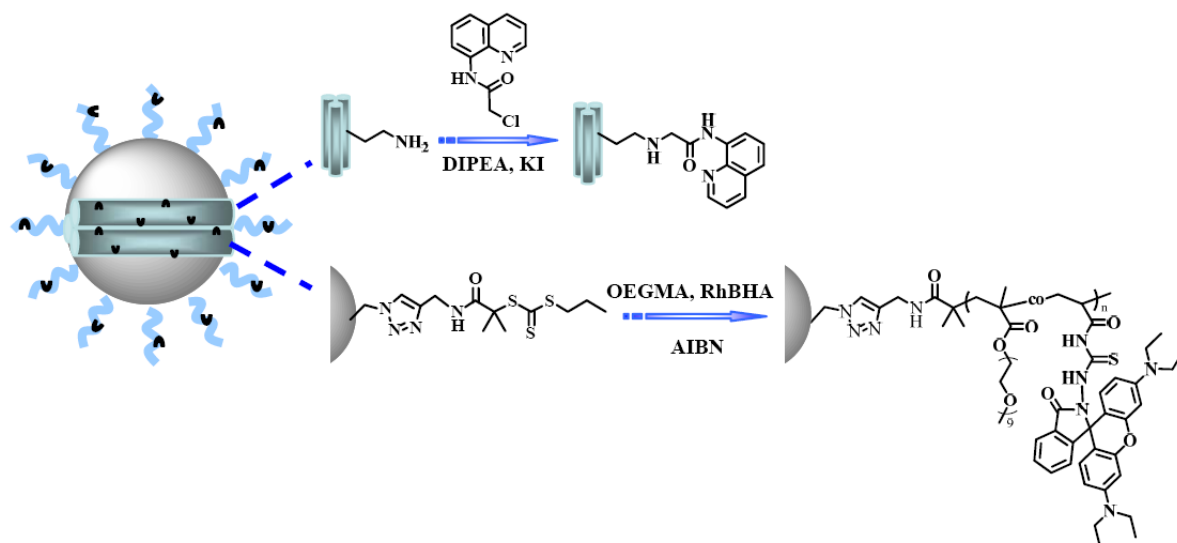

**Scheme S2.** Detailed procedures for the preparation of  $\text{P}(\text{OEGMA-co-RhBHA})$  coated MSN with CQA in the inner surface.

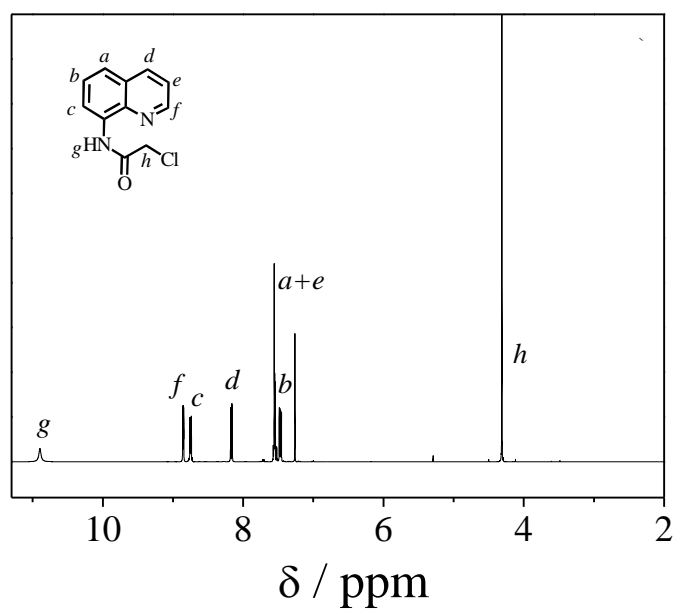

**Figure S1.**  $^1\text{H}$  NMR spectrum obtained for CQA in  $\text{CDCl}_3$ .

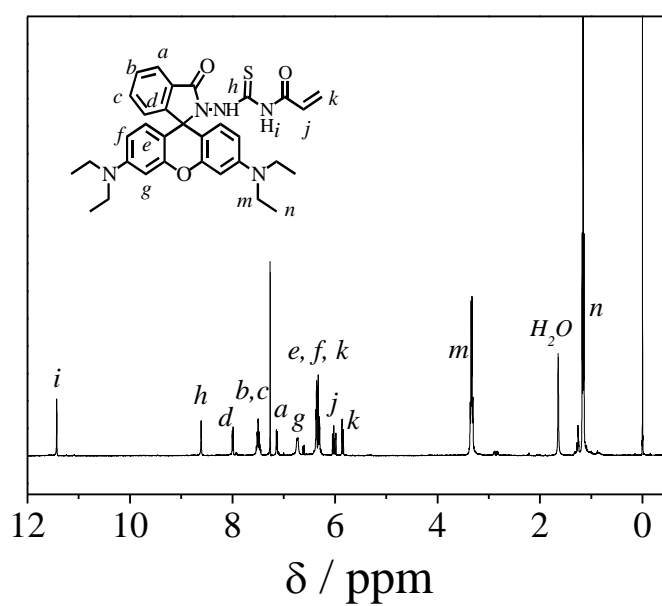

**Figure S2.**  $^1\text{H}$  NMR spectrum obtained for RhBHA in  $\text{CDCl}_3$ .

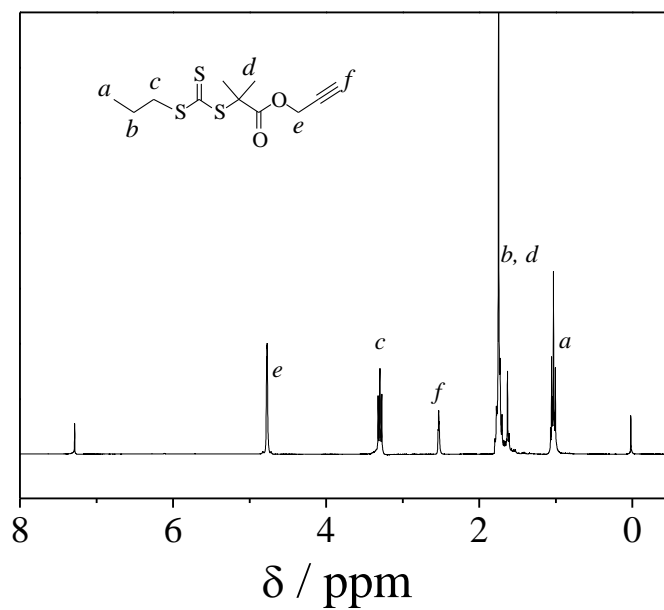

**Figure S3.**  $^1\text{H}$  NMR spectrum obtained for *alkynyl*-functionalized RAFT agent PDMAT in  $\text{CDCl}_3$ .

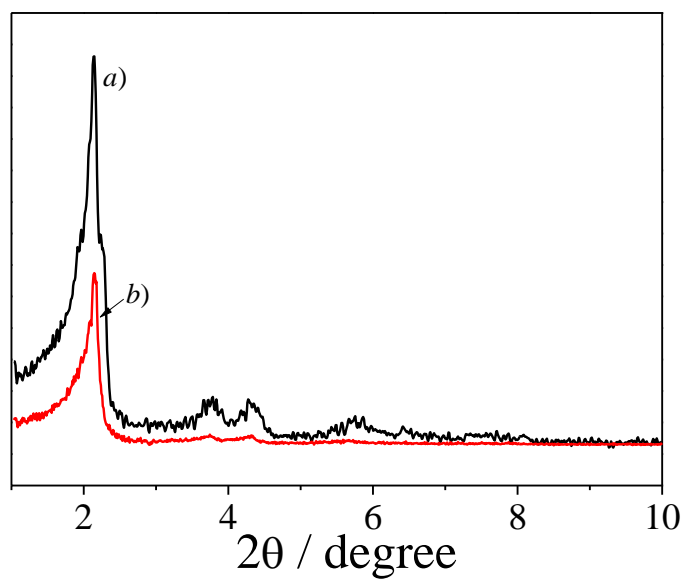

**Figure S4.** XRD of (a)  $N_3\text{-MSN}(\text{NH}_2)$ , and (b)  $\text{P}(\text{OEGMA-co-RhBHA})$  coated MSN with CQA in the inner surface.

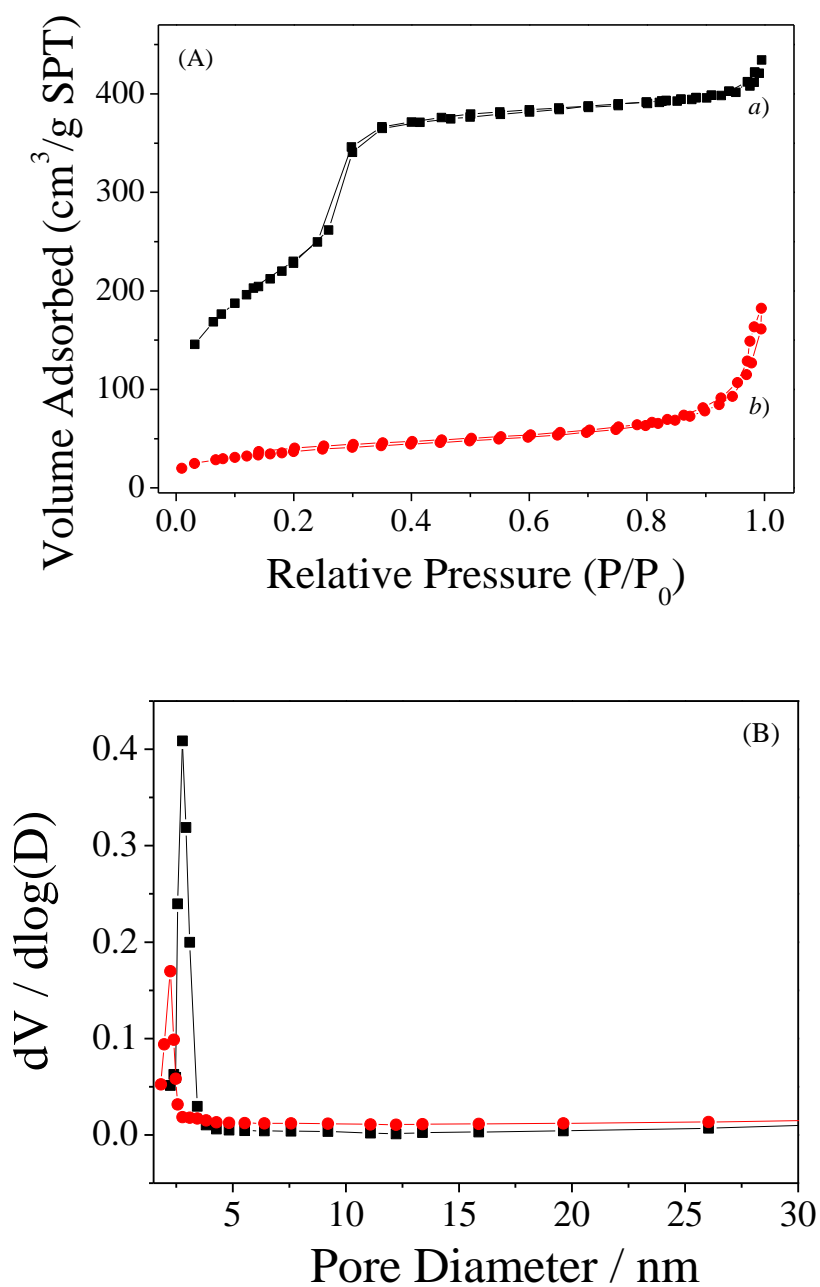

**Figure S5.** (A) BET nitrogen sorption isotherms and (B) BJH pore size distribution plots of (a)  $N_3$ -MSN( $NH_2$ ), and (b) P(OEGMA-co-RhBHA) coated MSN with CQA in the inner surface.

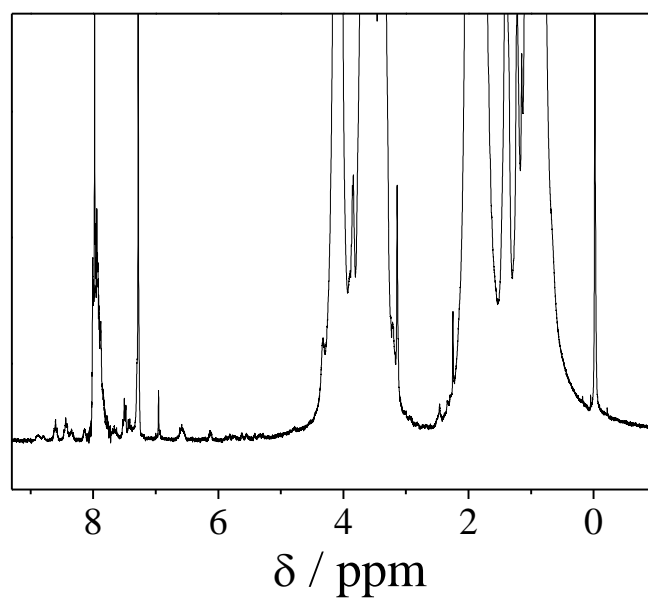

**Figure S6.** <sup>1</sup>H NMR spectrum obtained for the constituents cleaved from P(OEGMA-*co*-RhBHA) coated MSN(CQA) in CDCl<sub>3</sub>.

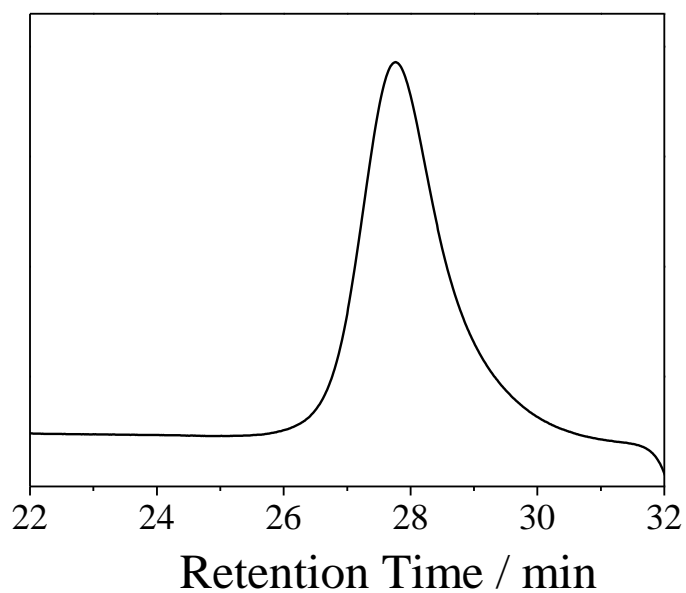

**Figure S7.** THF GPC curve obtained for the constituents cleaved from P(OEGMA-*co*-RhBHA) coated MSN(CQA).

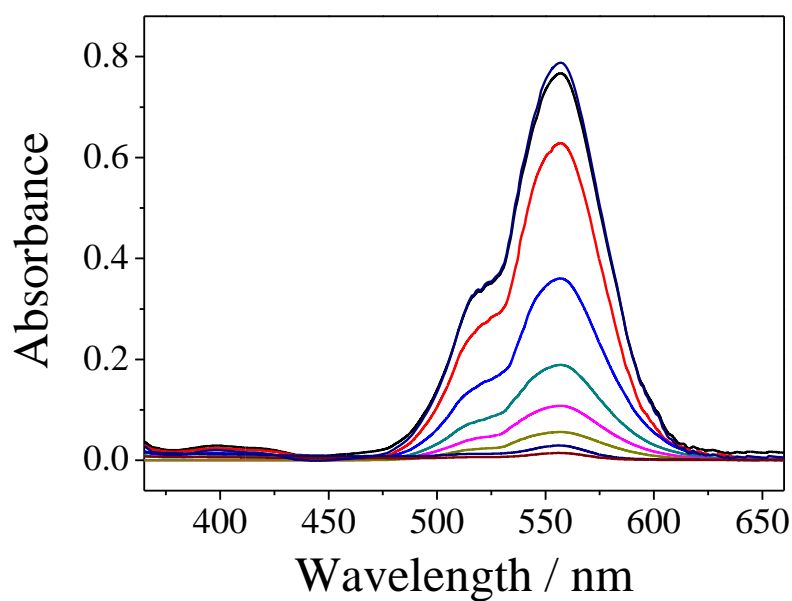

**Figure S8.** UV-Vis absorbance spectra recorded for RhBHA (2 μM, pH 7.0) in 99:1 (v/v) H<sub>2</sub>O-CH<sub>3</sub>CN solution upon gradual addition of Hg<sup>2+</sup> (0-10 μM ).

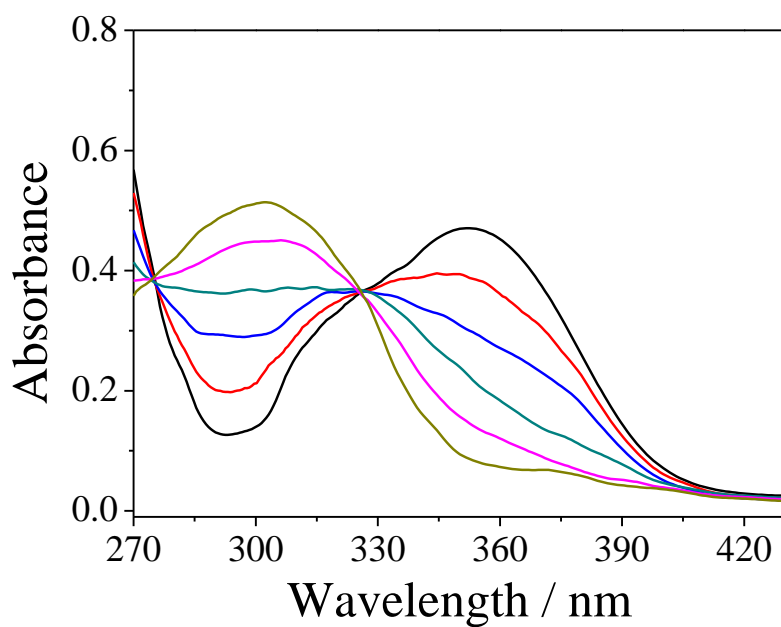

**Figure S9.** UV-Vis absorbance spectra recorded for CQA derivatives (10 μM, pH 7.0) in 99:1 (v/v) H<sub>2</sub>O-CH<sub>3</sub>CN solution upon gradual addition of Zn<sup>2+</sup> (0-10 μM ).

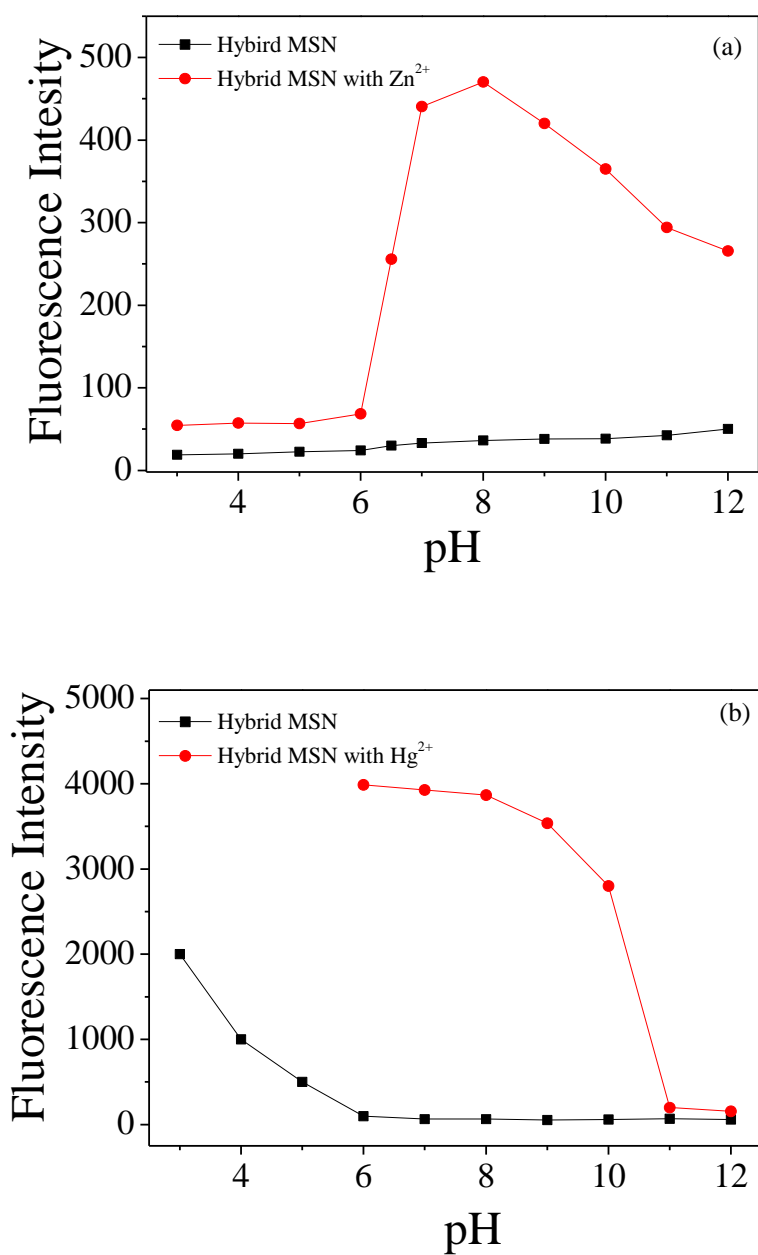

**Figure S10.** Fluorescence intensity of the hybrid MSN aqueous solution (0.05 g/L) at various pH values in the absence and presence of 5 equiv. (a) Zn<sup>2+</sup> (λ<sub>ex</sub> = 370 nm, λ<sub>em</sub> = 501 nm), and (b) Hg<sup>2+</sup> (λ<sub>ex</sub> = 520 nm, λ<sub>em</sub> = 580 nm).

**Fluorescence Detection of  $\text{Hg}^{2+}$  and  $\text{Zn}^{2+}$  in Tap Water.** Tap water was collected in the chemical synthesis laboratory of graduate school at Shenzhen, Tsinghua University (Nanshan District, Shenzhen City), and boiling for 10 min before use. Standard addition method was utilized to justify the detection reliability for the current hybrid mesoporous materials following the same procedures according to literature report.<sup>1</sup> After the addition of  $\text{Hg}^{2+}$  and  $\text{Zn}^{2+}$  with different known concentration levels, P(OEGMA-*co*-RhBHA) coated MSN(CQA) was introduced to the tap water, and then the mixture was subjected to fluorescence measurement, obtaining a recovery between 94 and 105%.

## Reference

1. Y. X. Wang, L. M. Xiong, F. H. Geng, F. Q. Zhang, M. T. Xu, *Analyst*, 2011, **136**, 4809-4814.
